# Supplementary material
Source: Copernicus journal article supplement (doi:10.5194/we-26-103-2026)
Supplement: Supplementary file 1 [file we-26-103-2026-supplement.pdf]

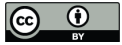

*Supplement of*

## **Landscape context outweighs field-scale features in structuring bird communities in West African smallholder rice agroecosystems**

**Paula Lopes et al.**

*Correspondence to:* Paula Lopes (fc40987@alunos.ciencias.ulisboa.pt)

The copyright of individual parts of the supplement might differ from the article licence.

## Supplement

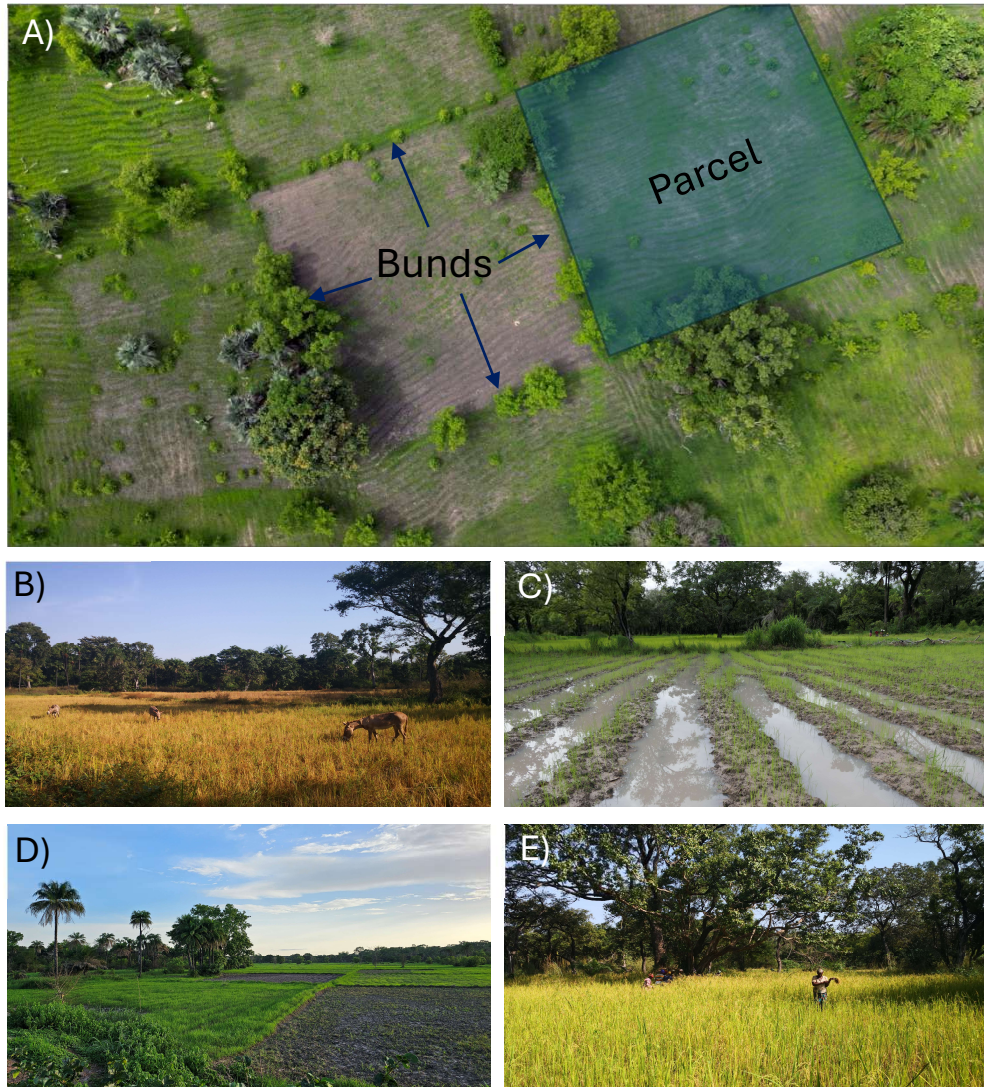

**Figure S1** – Rice fields in the study area. (A) Drone aerial photograph showing the parcel and bund layout. (B) Harvested phase in Bereco. (C) Vegetative phase in Djalicunda. (D) Sowing phase, with parcels clearly distinguished, in Bironqui. (E) Mature phase in Mambonco

**Table S1** – Land cover classification used for mapping the area around the studied rice fields, adapted and simplified from the IUCN Habitat Classification Scheme to the study area.

| <b>Class</b> | <b>Description</b>                                                                                                                             |
|--------------|------------------------------------------------------------------------------------------------------------------------------------------------|
| Mudflat      | Flat intertidal zone, covered by mud.                                                                                                          |
| Open         | Area with tree and shrub cover below 40%, including agricultural lands (located close to or distant from settlements) and recent burned areas. |
| Wooded       | Area with tree and shrub cover between 40% and 60%, including cashew orchards and some secondary woodlands.                                    |
| Forested     | Area with more than 60% tree and shrub cover, including cashew orchards and patches of native and secondary forests.                           |
| Built-up     | Settlements of any size and tarmac roads.                                                                                                      |

**Table S2** – List of bird species recorded in rice fields. Orders and families follow IOC taxonomy (v15.1). Diet groups are based on AVONET database. AI = Abundance Index (1: Accidental; 2–5: Rare; 6–50: Common; > 50: Very common).

| <b>Scientific name</b>         | <b>Common name</b>         | <b>AI</b> | <b>Diet</b>           |
|--------------------------------|----------------------------|-----------|-----------------------|
| <b>ORDER ANSERIFORMES</b>      |                            |           |                       |
| <b>Family Anatidae</b>         |                            |           |                       |
| <i>Dendrocygna viduata</i>     | White-faced Whistling Duck | C         | Herbivore aquatic     |
| <i>Plectropterus gambensis</i> | Spur-winged Goose          | C         | Omnivore              |
| <b>GALLIFORMES</b>             |                            |           |                       |
| <b>Odontophoridae</b>          |                            |           |                       |
| <i>Ptilopachus petrosus</i>    | Stone Partridge            | A         | Omnivore              |
| <b>Phasianidae</b>             |                            |           |                       |
| <i>Pternistis ahantensis</i>   | Ahanta Spurfowl            | R         | Herbivore terrestrial |
| <i>Pternistis bicalcaratus</i> | Double-spurred Spurfowl    | VC        | Omnivore              |
| <b>APODIFORMES</b>             |                            |           |                       |
| <b>Apodidae</b>                |                            |           |                       |
| <i>Telacanthura ussheri</i>    | Mottled Spinetail          | A         | Invertivore           |
| <i>Cypsiurus parvus</i>        | African Palm Swift         | C         | Invertivore           |
| <i>Apus affinis</i>            | Little Swift               | R         | Invertivore           |
| <i>Apus caffer</i>             | White-rumped Swift         | R         | Invertivore           |
| <b>MUSOPHAGIFORMES</b>         |                            |           |                       |
| <b>Musophagidae</b>            |                            |           |                       |
| <i>Crinifer piscator</i>       | Western Plantain-eater     | VC        | Frugivore             |
| <i>Tauraco violaceus</i>       | Violet Turaco              | VC        | Frugivore             |
| <i>Tauraco persa</i>           | Guinea Turaco              | C         | Frugivore             |

**OTIDIFORMES****Otididae**

|                              |                       |   |             |
|------------------------------|-----------------------|---|-------------|
| <i>Lissotis melanogaster</i> | Black-bellied Bustard | A | Invertivore |
|------------------------------|-----------------------|---|-------------|

**CUCULIFORMES****Cuculidae**

|                               |                |    |           |
|-------------------------------|----------------|----|-----------|
| <i>Centropus senegalensis</i> | Senegal Coucal | VC | Vertivore |
|-------------------------------|----------------|----|-----------|

|                          |              |   |             |
|--------------------------|--------------|---|-------------|
| <i>Centropus grillii</i> | Black Coucal | R | Invertivore |
|--------------------------|--------------|---|-------------|

|                            |                      |   |             |
|----------------------------|----------------------|---|-------------|
| <i>Clamator glandarius</i> | Great Spotted Cuckoo | A | Invertivore |
|----------------------------|----------------------|---|-------------|

|                              |                     |   |             |
|------------------------------|---------------------|---|-------------|
| <i>Clamator levaillantii</i> | Levaillant's Cuckoo | C | Invertivore |
|------------------------------|---------------------|---|-------------|

|                             |                  |   |             |
|-----------------------------|------------------|---|-------------|
| <i>Chrysococcyx caprius</i> | Diederick Cuckoo | R | Invertivore |
|-----------------------------|------------------|---|-------------|

|                           |                |   |             |
|---------------------------|----------------|---|-------------|
| <i>Chrysococcyx klaas</i> | Klaas's Cuckoo | C | Invertivore |
|---------------------------|----------------|---|-------------|

|                           |                    |   |             |
|---------------------------|--------------------|---|-------------|
| <i>Cuculus solitarius</i> | Red-chested Cuckoo | R | Invertivore |
|---------------------------|--------------------|---|-------------|

|                        |                |   |             |
|------------------------|----------------|---|-------------|
| <i>Cuculus gularis</i> | African Cuckoo | C | Invertivore |
|------------------------|----------------|---|-------------|

**COLUMBIFORMES****Columbidae**

|                       |                 |   |           |
|-----------------------|-----------------|---|-----------|
| <i>Columba guinea</i> | Speckled Pigeon | C | Granivore |
|-----------------------|-----------------|---|-----------|

|                               |                        |   |           |
|-------------------------------|------------------------|---|-----------|
| <i>Streptopelia decipiens</i> | Mourning Collared Dove | A | Granivore |
|-------------------------------|------------------------|---|-----------|

|                                  |               |    |           |
|----------------------------------|---------------|----|-----------|
| <i>Streptopelia semitorquata</i> | Red-eyed Dove | VC | Granivore |
|----------------------------------|---------------|----|-----------|

|                             |                |    |           |
|-----------------------------|----------------|----|-----------|
| <i>Streptopelia vinacea</i> | Vinaceous Dove | VC | Granivore |
|-----------------------------|----------------|----|-----------|

|                                |               |   |           |
|--------------------------------|---------------|---|-----------|
| <i>Spilopelia senegalensis</i> | Laughing Dove | C | Granivore |
|--------------------------------|---------------|---|-----------|

|                           |                        |   |           |
|---------------------------|------------------------|---|-----------|
| <i>Turtur abyssinicus</i> | Black-billed Wood Dove | C | Granivore |
|---------------------------|------------------------|---|-----------|

|                    |                        |   |           |
|--------------------|------------------------|---|-----------|
| <i>Turtur afer</i> | Blue-spotted Wood Dove | R | Granivore |
|--------------------|------------------------|---|-----------|

|                      |                      |   |           |
|----------------------|----------------------|---|-----------|
| <i>Treron calvus</i> | African Green Pigeon | C | Granivore |
|----------------------|----------------------|---|-----------|

**CHARADRIIFORMES****Charadriidae**

|                          |                     |   |          |
|--------------------------|---------------------|---|----------|
| <i>Vanellus spinosus</i> | Spur-winged Lapwing | C | Omnivore |
|--------------------------|---------------------|---|----------|

|                            |                         |    |                  |
|----------------------------|-------------------------|----|------------------|
| <i>Vanellus senegallus</i> | African Wattled Lapwing | VC | Aquatic predator |
|----------------------------|-------------------------|----|------------------|

**Rostratulidae**

|                                |                       |   |                  |
|--------------------------------|-----------------------|---|------------------|
| <i>Rostratula benghalensis</i> | Greater Painted-Snipe | R | Aquatic predator |
|--------------------------------|-----------------------|---|------------------|

**Jacanidae**

|                                |                |   |                  |
|--------------------------------|----------------|---|------------------|
| <i>Actophilornis africanus</i> | African Jacana | A | Aquatic predator |
|--------------------------------|----------------|---|------------------|

**Scolopacidae**

|                        |                 |   |                  |
|------------------------|-----------------|---|------------------|
| <i>Tringa ochropus</i> | Green Sandpiper | R | Aquatic predator |
|------------------------|-----------------|---|------------------|

|                        |                |   |                  |
|------------------------|----------------|---|------------------|
| <i>Tringa glareola</i> | Wood Sandpiper | A | Aquatic predator |
|------------------------|----------------|---|------------------|

|                       |                 |   |                  |
|-----------------------|-----------------|---|------------------|
| <i>Tringa totanus</i> | Common Redshank | R | Aquatic predator |
|-----------------------|-----------------|---|------------------|

**SULIFORMES****Phalacrocoracidae**

|                             |                |   |                  |
|-----------------------------|----------------|---|------------------|
| <i>Microcarbo africanus</i> | Reed Cormorant | C | Aquatic predator |
|-----------------------------|----------------|---|------------------|

**PELECANIFORMES****Threskiornithidae**

|                            |             |   |             |
|----------------------------|-------------|---|-------------|
| <i>Bostrychia hagedash</i> | Hadada Ibis | A | Invertivore |
|----------------------------|-------------|---|-------------|

**Ardeidae**

|                         |               |   |                  |
|-------------------------|---------------|---|------------------|
| <i>Botaurus sturmii</i> | Dwarf Bittern | C | Aquatic predator |
|-------------------------|---------------|---|------------------|

|                              |                           |   |                  |
|------------------------------|---------------------------|---|------------------|
| <i>Nycticorax nycticorax</i> | Black-crowned Night Heron | A | Aquatic predator |
|------------------------------|---------------------------|---|------------------|

|                         |              |   |                  |
|-------------------------|--------------|---|------------------|
| <i>Egretta garzetta</i> | Little Egret | A | Aquatic predator |
|-------------------------|--------------|---|------------------|

|                          |                |   |                  |
|--------------------------|----------------|---|------------------|
| <i>Butorides striata</i> | Striated Heron | C | Aquatic predator |
|--------------------------|----------------|---|------------------|

|                                 |                             |    |                  |
|---------------------------------|-----------------------------|----|------------------|
| <i>Ardeola ralloides</i>        | Squacco Heron               | C  | Aquatic predator |
| <i>Ardea alba</i>               | Great Egret                 | C  | Aquatic predator |
| <i>Ardea brachyrhyncha</i>      | Yellow-billed Egret         | C  | Aquatic predator |
| <i>Ardea ibis</i>               | Western Cattle Egret        | C  | Omnivore         |
| <i>Ardea melanocephala</i>      | Black-headed Heron          | VC | Omnivore         |
| <b>Scopidae</b>                 |                             |    |                  |
| <i>Scopus umbretta</i>          | Hamerkop                    | VC | Omnivore         |
| ACCIPITRIFORMES                 |                             |    |                  |
| <b>Accipitridae</b>             |                             |    |                  |
| <i>Elanus caeruleus</i>         | Black-winged Kite           | A  | Vertivore        |
| <i>Polyboroides typus</i>       | African Harrier-Hawk        | C  | Vertivore        |
| <i>Gypohierax angolensis</i>    | Palm-nut Vulture            | C  | Frugivore        |
| <i>Necrosyrtes monachus</i>     | Hooded Vulture              | C  | Scavenger        |
| <i>Lophaetus occipitalis</i>    | Long-crested Eagle          | C  | Vertivore        |
| <i>Hieraaetus wahlbergi</i>     | Wahlberg's Eagle            | C  | Vertivore        |
| <i>Micronisus gabar</i>         | Gabar Goshawk               | R  | Vertivore        |
| <i>Kaupifalco monogrammicus</i> | Lizard Buzzard              | VC | Invertivore      |
| <i>Tachyspiza badia</i>         | Shikra                      | R  | Vertivore        |
| <i>Astur melanoleucus</i>       | Black Sparrowhawk           | A  | Vertivore        |
| <i>Milvus aegyptius</i>         | Yellow-billed Kite          | R  | Omnivore         |
| BUCEROTIFORMES                  |                             |    |                  |
| <b>Phoeniculidae</b>            |                             |    |                  |
| <i>Phoeniculus purpureus</i>    | Green Wood Hoopoe           | VC | Invertivore      |
| <b>Bucerotidae</b>              |                             |    |                  |
| <i>Tockus kempfi</i>            | Western Red-billed Hornbill | VC | Invertivore      |
| <i>Lophoceros fasciatus</i>     | Congo Pied Hornbill         | VC | Omnivore         |
| <i>Lophoceros nasutus</i>       | African Grey Hornbill       | C  | Invertivore      |
| <i>Bycanistes fistulator</i>    | Piping Hornbill             | R  | Frugivore        |
| CORACIIFORMES                   |                             |    |                  |
| <b>Coraciidae</b>               |                             |    |                  |
| <i>Coracias abyssinicus</i>     | Abyssinian Roller           | VC | Invertivore      |
| <i>Coracias cyanogaster</i>     | Blue-bellied Roller         | VC | Invertivore      |
| <i>Eurystomus glaucurus</i>     | Broad-billed Roller         | C  | Invertivore      |
| <b>Alcedinidae</b>              |                             |    |                  |
| <i>Halcyon leucocephala</i>     | Grey-headed Kingfisher      | A  | Invertivore      |
| <i>Halcyon malimbica</i>        | Blue-breasted Kingfisher    | C  | Invertivore      |
| <i>Halcyon senegalensis</i>     | Woodland Kingfisher         | C  | Invertivore      |
| <i>Ispidina picta</i>           | African Pygmy Kingfisher    | C  | Invertivore      |
| <b>Meropidae</b>                |                             |    |                  |
| <i>Merops apiaster</i>          | European Bee-eater          | R  | Invertivore      |
| PICIFORMES                      |                             |    |                  |
| <b>Lybiidae</b>                 |                             |    |                  |
| <i>Pogoniulus chrysoconus</i>   | Yellow-fronted Tinkerbird   | A  | Frugivore        |
| <i>Pogonornis dubius</i>        | Bearded Barbet              | C  | Frugivore        |
| <b>Indicatoridae</b>            |                             |    |                  |
| <i>Indicator minor</i>          | Lesser Honeyguide           | A  | Invertivore      |

|                                     |                                 |    |             |
|-------------------------------------|---------------------------------|----|-------------|
| <i>Indicator indicator</i>          | Greater Honeyguide              | C  | Invertivore |
| <b>Picidae</b>                      |                                 |    |             |
| <i>Campethera punctuligera</i>      | Fine-spotted Woodpecker         | C  | Invertivore |
| <i>Dendropicos fuscescens</i>       | Cardinal Woodpecker             | A  | Invertivore |
| <i>Dendropicos goertae</i>          | African Grey Woodpecker         | R  | Invertivore |
| FALCONIFORMES                       |                                 |    |             |
| <b>Falconidae</b>                   |                                 |    |             |
| <i>Falco tinnunculus</i>            | Common Kestrel                  | A  | Vertivore   |
| <i>Falco ardosiaceus</i>            | Grey Kestrel                    | C  | Vertivore   |
| <i>Falco chicquera</i>              | Red-necked Falcon               | R  | Vertivore   |
| <i>Falco cuvierii</i>               | African Hobby                   | A  | Omnivore    |
| PSITTACIFORMES                      |                                 |    |             |
| <b>Psittacidae</b>                  |                                 |    |             |
| <i>Poicephalus senegalus</i>        | Senegal Parrot                  | VC | Omnivore    |
| <b>Psittaculidae</b>                |                                 |    |             |
| <i>Psittacula krameri</i>           | Rose-ringed Parakeet            | VC | Omnivore    |
| PASSERIFORMES                       |                                 |    |             |
| <b>Platysteiridae</b>               |                                 |    |             |
| <i>Platysteira cyanea</i>           | Brown-throated Wattle-eye       | C  | Invertivore |
| <b>Malaconotidae</b>                |                                 |    |             |
| <i>Malaconotus blanchoti</i>        | Grey-headed Bushshrike          | C  | Invertivore |
| <i>Chlorophoneus sulfureopectus</i> | Sulphur-breasted Bushshrike     | C  | Invertivore |
| <i>Dryoscopus gambensis</i>         | Northern Puffback               | R  | Invertivore |
| <i>Laniarius turatii</i>            | Turati's Boubou                 | R  | Invertivore |
| <i>Laniarius barbarus</i>           | Yellow-crowned Gonolek          | C  | Invertivore |
| <b>Vangidae</b>                     |                                 |    |             |
| <i>Prionops plumatus</i>            | White-crested Helmetshrike      | R  | Invertivore |
| <b>Oriolidae</b>                    |                                 |    |             |
| <i>Oriolus auratus</i>              | African Golden Oriole           | VC | Omnivore    |
| <b>Dicruridae</b>                   |                                 |    |             |
| <i>Dicrurus adsimilis</i>           | Fork-tailed Drongo              | VC | Invertivore |
| <b>Monarchidae</b>                  |                                 |    |             |
| <i>Terpsiphone rufiventer</i>       | Red-bellied Paradise Flycatcher | C  | Invertivore |
| <i>Terpsiphone viridis</i>          | African Paradise Flycatcher     | R  | Invertivore |
| <b>Laniidae</b>                     |                                 |    |             |
| <i>Lanius corvinus</i>              | Yellow-billed Shrike            | VC | Invertivore |
| <b>Corvidae</b>                     |                                 |    |             |
| <i>Ptilostomus afer</i>             | Piapiac                         | VC | Omnivore    |
| <i>Corvus albus</i>                 | Pied Crow                       | A  | Omnivore    |
| <b>Pycnonotidae</b>                 |                                 |    |             |
| <i>Atimastillas flavicollis</i>     | Yellow-gorgeted Greenbul        | VC | Frugivore   |
| <i>Pycnonotus barbatus</i>          | Common Bulbul                   | VC | Frugivore   |
| <b>Hirundinidae</b>                 |                                 |    |             |
| <i>Psalidoprocne obscura</i>        | Fanti Saw-wing                  | A  | Invertivore |
| <i>Riparia riparia</i>              | Sand Martin                     | R  | Invertivore |
| <i>Hirundo lucida</i>               | Red-chested Swallow             | C  | Invertivore |

|                                   |                              |    |             |
|-----------------------------------|------------------------------|----|-------------|
| <i>Hirundo smithii</i>            | Wire-tailed Swallow          | C  | Invertivore |
| <i>Cecropis semirufa</i>          | Red-breasted Swallow         | R  | Invertivore |
| <b>Macrosphenidae</b>             |                              |    |             |
| <i>Melocichla mentalis</i>        | Moustached Grass Warbler     | VC | Invertivore |
| <i>Sylvietta brachyura</i>        | Northern Crombec             | R  | Invertivore |
| <b>Phylloscopidae</b>             |                              |    |             |
| <i>Phylloscopus trochilus</i>     | Willow Warbler               | R  | Invertivore |
| <b>Acrocephalidae</b>             |                              |    |             |
| <i>Hippolais polyglotta</i>       | Melodious Warbler            | R  | Invertivore |
| <b>Cisticolidae</b>               |                              |    |             |
| <i>Cisticola cantans</i>          | Singing Cisticola            | VC | Invertivore |
| <i>Cisticola lateralis</i>        | Whistling Cisticola          | C  | Invertivore |
| <i>Cisticola juncidis</i>         | Zitting Cisticola            | C  | Invertivore |
| <i>Prinia subflava</i>            | Tawny-flanked Prinia         | VC | Invertivore |
| <i>Prinia erythroptera</i>        | Red-winged Prinia            | C  | Invertivore |
| <i>Cameroptera brachyura</i>      | Green-backed Cameroptera     | C  | Invertivore |
| <i>Eremomela pusilla</i>          | Senegal Eremomela            | C  | Invertivore |
| <b>Sylviidae</b>                  |                              |    |             |
| <i>Sylvia atricapilla</i>         | Eurasian Blackcap            | R  | Omnivore    |
| <b>Leiothrichidae</b>             |                              |    |             |
| <i>Turdoides plebejus</i>         | Brown Babbler                | C  | Invertivore |
| <i>Turdoides reinwardtii</i>      | Blackcap Babbler             | C  | Omnivore    |
| <b>Hylotiidae</b>                 |                              |    |             |
| <i>Hyliota flavigaster</i>        | Yellow-bellied Hyliota       | A  | Invertivore |
| <b>Sturnidae</b>                  |                              |    |             |
| <i>Lamprotornis chalcurus</i>     | Bronze-tailed Starling       | R  | Omnivore    |
| <i>Lamprotornis purpureus</i>     | Purple Starling              | VC | Omnivore    |
| <i>Lamprotornis caudatus</i>      | Long-tailed Glossy Starling  | VC | Frugivore   |
| <i>Cinnyricinclus leucogaster</i> | Violet-backed Starling       |    | Frugivore   |
| <b>Turdidae</b>                   |                              |    |             |
| <i>Turdus pelios</i>              | African Thrush               | C  | Omnivore    |
| <b>Muscicapidae</b>               |                              |    |             |
| <i>Melaenornis edolioides</i>     | Northern Black Flycatcher    | C  | Invertivore |
| <i>Cossypha albicapillus</i>      | White-crowned Robin-Chat     | R  | Invertivore |
| <i>Cossypha niveicapilla</i>      | Snowy-crowned Robin-Chat     | A  | Invertivore |
| <b>Nectariniidae</b>              |                              |    |             |
| <i>Cinnyris pulchellus</i>        | Beautiful Sunbird            | C  | Nectarivore |
| <i>Cinnyris coccinogastrus</i>    | Splendid Sunbird             | C  | Omnivore    |
| <i>Cinnyris venustus</i>          | Variable Sunbird             | A  | Nectarivore |
| <i>Cinnyris cupreus</i>           | Copper Sunbird               | C  | Nectarivore |
| <b>Passeridae</b>                 |                              |    |             |
| <i>Passer griseus</i>             | Northern Grey-headed Sparrow | A  | Granivore   |
| <b>Ploceidae</b>                  |                              |    |             |
| <i>Ploceus brachypterus</i>       | Olive-naped Weaver           | C  | Invertivore |
| <i>Ploceus cucullatus</i>         | Village Weaver               | VC | Granivore   |
| <i>Ploceus melanocephalus</i>     | Black-headed Weaver          | VC | Granivore   |

|                                   |                          |    |           |
|-----------------------------------|--------------------------|----|-----------|
| <i>Quelea erythroga</i>           | Red-headed Quelea        | R  | Granivore |
| <i>Quelea quelea</i>              | Red-billed Quelea        | C  | Granivore |
| <i>Euplectes hordeaceus</i>       | Black-winged Red Bishop  | C  | Granivore |
| <i>Euplectes franciscanus</i>     | Northern Red Bishop      | VC | Granivore |
| <i>Euplectes macroura</i>         | Yellow-mantled Widowbird | VC | Granivore |
| <b>Estrildidae</b>                |                          |    |           |
| <i>Spermestes cucullata</i>       | Bronze Mannikin          | C  | Granivore |
| <i>Glaucostriola caerulescens</i> | Lavender Waxbill         | A  | Granivore |
| <i>Estrilda melpoda</i>           | Orange-cheeked Waxbill   | VC | Granivore |
| <i>Uraeginthus bengalus</i>       | Red-cheeked Cordon-bleu  | VC | Granivore |
| <i>Pytilia phoenicoptera</i>      | Red-winged Pytilia       | A  | Granivore |
| <i>Lagonosticta senegala</i>      | Red-billed Firefinch     | C  | Granivore |
| <b>Viduidae</b>                   |                          |    |           |
| <i>Vidua chalybeata</i>           | Village Indigobird       | R  | Granivore |
| <i>Vidua macroura</i>             | Pin-tailed Whydah        | VC | Granivore |

**Table S3** – Univariate Linear Mixed Models (LMMs) fitted to bird species richness with field features (field width, parcel area or tree cover) as fixed effects and month of the year as a random effect. Log transformation of species richness was applied for the models of frugivores, invertivores and omnivores. *Std. error* = standard error; *Std. dev.* = standard deviation. Significant p-values for explanatory variables are shown in bold.

| Model              | Fixed effects |           |            |          | Random effects  |          |          |           |
|--------------------|---------------|-----------|------------|----------|-----------------|----------|----------|-----------|
|                    |               | Estimate  | Std. error | t-value  | p-value         |          | Variance | Std. dev. |
| <b>All species</b> |               |           |            |          |                 |          |          |           |
| <i>Parcel area</i> | Intercept     | 18.558    | 1.141      | 16.269   | 1.65E-05        | Month    | 7.430    | 2.726     |
|                    | Parcel area   | 9.27E-03  | 0.228      | 4.06E-02 | 0.968           | Residual | 11.471   | 3.387     |
| <i>Tree cover</i>  | Intercept     | 18.577    | 1.165      | 15.948   | 1.81E-05        | Month    | 7.775    | 2.788     |
|                    | Tree cover    | 0.524     | 0.225      | 2.331    | <b>2.07E-02</b> | Residual | 11.181   | 3.344     |
| <i>Field width</i> | Intercept     | 18.526    | 1.095      | 16.914   | 1.39E-05        | Month    | 6.829    | 2.613     |
|                    | Width         | 0.522     | 0.230      | 2.275    | <b>2.39E-02</b> | Residual | 11.225   | 3.350     |
| <b>Frugivores</b>  |               |           |            |          |                 |          |          |           |
| <i>Parcel area</i> | Intercept     | 0.991     | 3.78E-02   | 26.226   | 6.19E-70        | Month    | 0.000    | 0.000     |
|                    | Parcel area   | 3.23E-02  | 3.78E-02   | 0.855    | 0.394           | Residual | 0.320    | 0.566     |
| <i>Tree cover</i>  | Intercept     | 1.000     | 4.74E-02   | 21.108   | 1.27E-04        | Month    | 4.91E-03 | 7.01E-02  |
|                    | Tree cover    | 0.152     | 3.64E-02   | 4.163    | <b>4.51E-05</b> | Residual | 0.295    | 0.544     |
| <i>Field width</i> | Intercept     | 0.991     | 3.61E-02   | 27.441   | 2.81E-73        | Month    | 0.000    | 0.000     |
|                    | Width         | 0.169     | 3.61E-02   | 4.675    | <b>5.11E-06</b> | Residual | 0.292    | 0.541     |
| <b>Granivores</b>  |               |           |            |          |                 |          |          |           |
| <i>Parcel area</i> | Intercept     | 4.967     | 0.445      | 11.162   | 1.20E-04        | Month    | 1.089    | 1.044     |
|                    | Parcel area   | -1.92E-02 | 0.117      | -0.163   | 0.871           | Residual | 3.033    | 1.742     |
| <i>Tree cover</i>  | Intercept     | 4.970     | 0.449      | 11.069   | 1.24E-04        | Month    | 1.111    | 1.054     |
|                    | Tree cover    | 0.127     | 0.117      | 1.085    | 0.279           | Residual | 3.016    | 1.737     |
| <i>Field width</i> | Intercept     | 4.949     | 0.424      | 11.673   | 9.98E-05        | Month    | 0.982    | 0.991     |
|                    | Width         | 0.275     | 0.118      | 2.333    | <b>2.06E-02</b> | Residual | 2.966    | 1.722     |

| <b>Invertivores</b> |             |           |          |        |                 |          |          |       |
|---------------------|-------------|-----------|----------|--------|-----------------|----------|----------|-------|
| <i>Parcel area</i>  | Intercept   | 1.219     | 9.60E-02 | 12.699 | 8.09E-05        | Month    | 4.66E-02 | 0.216 |
|                     | Parcel area | -4.54E-02 | 3.50E-02 | -1.297 | 0.196           | Residual | 0.270    | 0.520 |
| <i>Tree cover</i>   | Intercept   | 1.223     | 0.100    | 12.198 | 8.68E-05        | Month    | 5.24E-02 | 0.229 |
|                     | Tree cover  | 0.157     | 3.34E-02 | 4.706  | <b>4.50E-06</b> | Residual | 0.247    | 0.497 |
| <i>Field width</i>  | Intercept   | 1.214     | 8.96E-02 | 13.537 | 6.96E-05        | Month    | 3.95E-02 | 0.199 |
|                     | Width       | 4.29E-02  | 3.56E-02 | 1.205  | 0.229           | Residual | 0.271    | 0.521 |
| <b>Omnivores</b>    |             |           |          |        |                 |          |          |       |
| <i>Field width</i>  | Intercept   | 0.965     | 6.22E-02 | 15.504 | 3.04E-05        | Month    | 1.48E-02 | 0.122 |
|                     | Width       | 0.131     | 3.56E-02 | 3.680  | <b>2.93E-04</b> | Residual | 0.274    | 0.523 |
| <i>Parcel area</i>  | Intercept   | 0.972     | 7.15E-02 | 13.586 | 4.23E-05        | Month    | 2.17E-02 | 0.147 |
|                     | Parcel area | 3.08E-02  | 3.61E-02 | 0.852  | 0.395           | Residual | 0.288    | 0.537 |
| <i>Tree cover</i>   | Intercept   | 0.975     | 7.46E-02 | 13.056 | 5.02E-05        | Month    | 2.44E-02 | 0.156 |
|                     | Tree cover  | 4.13E-02  | 3.60E-02 | 1.148  | 0.252           | Residual | 0.287    | 0.535 |

**Table S4** – Univariate Linear Mixed Models (LMMs) fitted to bird species richness with landscape metrics (fragmentation, edge complexity and Simpson’s diversity index) as fixed effects and month of the year as a random effect. Log transformation of species richness was applied for the models of frugivores, invertivores and omnivores. *Std. error* = standard error; *Std. dev.* = standard deviation. Significant p-values for explanatory variables are shown in bold.

| <b>Model</b>           | <b>Fixed effects</b> |           |            |           | <b>Random effects</b> |          |          |           |
|------------------------|----------------------|-----------|------------|-----------|-----------------------|----------|----------|-----------|
|                        |                      | Estimate  | Std. error | t-value   | p-value               |          | Variance | Std. dev. |
| <b>BUFFER 200 M</b>    |                      |           |            |           |                       |          |          |           |
| <b>All species</b>     |                      |           |            |           |                       |          |          |           |
| Fragmentation          | Intercept            | 18.570    | 1.139      | 16.304    | 1.62E-05              | Month    | 7.418    | 2.724     |
|                        | Fragmentation        | -0.542    | 0.224      | -2.422    | <b>1.63E-02</b>       | Residual | 11.170   | 3.342     |
| <i>Edge complexity</i> | Intercept            | 18.550    | 1.134      | 16.356    | 1.60E-05              | Month    | 7.342    | 2.710     |
|                        | Edge complex.        | -0.184    | 0.228      | -0.807    | 0.420                 | Residual | 11.440   | 3.382     |
| <i>Diversity</i>       | Intercept            | 18.566    | 1.148      | 16.175    | 1.69E-05              | Month    | 7.529    | 2.744     |
|                        | Diversity            | 0.195     | 0.227      | 0.858     | 0.392                 | Residual | 11.429   | 3.381     |
| <b>Frugivores</b>      |                      |           |            |           |                       |          |          |           |
| Fragmentation          | Intercept            | 0.991     | 3.78E-02   | 26.207    | 6.95E-70              | Month    | 0.000    | 0.000     |
|                        | Fragmentation        | 2.46E-02  | 3.78E-02   | 0.649     | 0.517                 | Residual | 0.320    | 0.566     |
| <i>Edge complexity</i> | Intercept            | 0.991     | 3.51E-02   | 28.228    | 2.13E-75              | Month    | 0.000    | 0.000     |
|                        | Edge complex.        | -0.211    | 3.51E-02   | -6.003    | <b>7.83E-09</b>       | Residual | 0.276    | 0.526     |
| <i>Diversity</i>       | Intercept            | 0.991     | 3.79E-02   | 26.183    | 8.15E-70              | Month    | 0.000    | 0.000     |
|                        | Diversity            | -1.94E-03 | 3.79E-02   | -5.12E-02 | 0.959                 | Residual | 0.321    | 0.567     |
| <b>Granivores</b>      |                      |           |            |           |                       |          |          |           |
| Fragmentation          | Intercept            | 4.962     | 0.444      | 11.171    | 1.17E-04              | Month    | 1.086    | 1.042     |
|                        | Fragmentation        | 0.183     | 0.116      | 1.580     | 0.116                 | Residual | 3.000    | 1.732     |
| <i>Edge complexity</i> | Intercept            | 4.957     | 0.438      | 11.327    | 1.11E-04              | Month    | 1.052    | 1.025     |
|                        | Edge complex.        | -0.204    | 0.116      | -1.753    | 8.11E-02              | Residual | 2.994    | 1.730     |

|                        |               |           |          |           |                 |          |          |       |
|------------------------|---------------|-----------|----------|-----------|-----------------|----------|----------|-------|
| <i>Diversity</i>       | Intercept     | 4.960     | 0.438    | 11.325    | 1.11E-04        | Month    | 1.053    | 1.026 |
|                        | Diversity     | -0.178    | 0.116    | -1.530    | 0.127           | Residual | 3.004    | 1.733 |
| <b>Invertivores</b>    |               |           |          |           |                 |          |          |       |
| <i>Fragmentation</i>   | Intercept     | 1.216     | 9.30E-02 | 13.071    | 6.94E-05        | Month    | 4.33E-02 | 0.208 |
|                        | Fragmentation | 6.02E-02  | 3.47E-02 | 1.734     | 8.43E-02        | Residual | 0.269    | 0.519 |
| <i>Edge complexity</i> | Intercept     | 1.212     | 8.94E-02 | 13.565    | 6.45E-05        | Month    | 3.95E-02 | 0.199 |
|                        | Edge complex. | -9.80E-02 | 3.45E-02 | -2.840    | <b>4.94E-03</b> | Residual | 0.263    | 0.513 |
| <i>Diversity</i>       | Intercept     | 1.216     | 9.31E-02 | 13.066    | 7.18E-05        | Month    | 4.33E-02 | 0.208 |
|                        | Diversity     | -1.85E-03 | 3.50E-02 | -5.28E-02 | 0.958           | Residual | 0.273    | 0.522 |
| <b>Omnivores</b>       |               |           |          |           |                 |          |          |       |
| <i>Fragmentation</i>   | Intercept     | 0.976     | 7.24E-02 | 13.494    | 4.27E-05        | Month    | 2.32E-02 | 0.152 |
|                        | Fragmentation | -0.166    | 3.41E-02 | -4.875    | <b>2.10E-06</b> | Residual | 0.260    | 0.510 |
| <i>Edge complexity</i> | Intercept     | 0.973     | 7.31E-02 | 13.311    | 4.61E-05        | Month    | 2.30E-02 | 0.152 |
|                        | Edge complex. | 2.48E-03  | 3.61E-02 | 6.87E-02  | 0.945           | Residual | 0.289    | 0.537 |
| <i>Diversity</i>       | Intercept     | 0.976     | 7.55E-02 | 12.923    | 5.29E-05        | Month    | 2.55E-02 | 0.160 |
|                        | Diversity     | 8.97E-02  | 3.55E-02 | 2.529     | <b>1.21E-02</b> | Residual | 0.280    | 0.529 |
| <b>BUFFER 400 M</b>    |               |           |          |           |                 |          |          |       |
| <b>All species</b>     |               |           |          |           |                 |          |          |       |
| <i>Fragmentation</i>   | Intercept     | 18.544    | 1.121    | 16.538    | 1.52E-05        | Month    | 7.176    | 2.679 |
|                        | Fragmentation | -0.478    | 0.225    | -2.123    | <b>3.49E-02</b> | Residual | 11.247   | 3.354 |
| <i>Edge complexity</i> | Intercept     | 18.482    | 1.035    | 17.857    | 1.04E-05        | Month    | 6.133    | 2.477 |
|                        | Edge complex. | 1.598     | 0.202    | 7.914     | <b>1.26E-13</b> | Residual | 8.936    | 2.989 |
| <i>Diversity</i>       | Intercept     | 18.554    | 1.142    | 16.250    | 1.64E-05        | Month    | 7.451    | 2.730 |
|                        | Diversity     | -0.384    | 0.225    | -1.704    | 8.97E-02        | Residual | 11.319   | 3.364 |
| <b>Frugivores</b>      |               |           |          |           |                 |          |          |       |
| <i>Fragmentation</i>   | Intercept     | 0.991     | 3.79E-02 | 26.183    | 8.14E-70        | Month    | 0.000    | 0.000 |
|                        | Fragmentation | -2.95E-03 | 3.79E-02 | -7.78E-02 | 0.938           | Residual | 0.321    | 0.567 |
| <i>Edge complexity</i> | Intercept     | 0.991     | 3.50E-02 | 28.325    | 1.17E-75        | Month    | 0.000    | 0.000 |
|                        | Edge complex. | 0.215     | 3.50E-02 | 6.150     | <b>3.57E-09</b> | Residual | 0.274    | 0.524 |
| <i>Diversity</i>       | Intercept     | 0.991     | 3.78E-02 | 26.205    | 7.06E-70        | Month    | 0.000    | 0.000 |
|                        | Diversity     | 2.34E-02  | 3.78E-02 | 0.618     | 0.537           | Residual | 0.321    | 0.566 |
| <b>Granivores</b>      |               |           |          |           |                 |          |          |       |
| <i>Fragmentation</i>   | Intercept     | 4.962     | 0.439    | 11.295    | 1.13E-04        | Month    | 1.060    | 1.029 |
|                        | Fragmentation | -0.128    | 0.117    | -1.100    | 0.273           | Residual | 3.019    | 1.737 |
| <i>Edge complexity</i> | Intercept     | 4.945     | 0.418    | 11.831    | 9.19E-05        | Month    | 0.955    | 0.977 |
|                        | Edge complex. | 0.424     | 0.114    | 3.711     | <b>2.63E-04</b> | Residual | 2.861    | 1.691 |
| <i>Diversity</i>       | Intercept     | 4.962     | 0.443    | 11.199    | 1.15E-04        | Month    | 1.082    | 1.040 |
|                        | Diversity     | -0.301    | 0.115    | -2.627    | <b>9.22E-03</b> | Residual | 2.941    | 1.715 |
| <b>Invertivores</b>    |               |           |          |           |                 |          |          |       |
| <i>Fragmentation</i>   | Intercept     | 1.217     | 9.33E-02 | 13.044    | 7.24E-05        | Month    | 4.35E-02 | 0.209 |
|                        | Fragmentation | 2.43E-03  | 3.50E-02 | 6.93E-02  | 0.945           | Residual | 0.273    | 0.522 |
| <i>Edge complexity</i> | Intercept     | 1.208     | 8.17E-02 | 14.788    | 4.71E-05        | Month    | 3.22E-02 | 0.180 |
|                        | Edge complex. | 0.170     | 3.34E-02 | 5.094     | <b>7.58E-07</b> | Residual | 0.245    | 0.495 |
| <i>Diversity</i>       | Intercept     | 1.216     | 9.29E-02 | 13.088    | 6.77E-05        | Month    | 4.32E-02 | 0.208 |
|                        | Diversity     | -7.62E-02 | 3.46E-02 | -2.206    | <b>2.84E-02</b> | Residual | 0.267    | 0.516 |

**Omnivores**

|                        |               |           |          |        |                 |          |          |       |
|------------------------|---------------|-----------|----------|--------|-----------------|----------|----------|-------|
| <i>Fragmentation</i>   | Intercept     | 0.971     | 7.09E-02 | 13.695 | 4.14E-05        | Month    | 2.13E-02 | 0.146 |
|                        | Fragmentation | -5.03E-02 | 3.59E-02 | -1.402 | 0.162           | Residual | 0.286    | 0.535 |
| <i>Edge complexity</i> | Intercept     | 0.966     | 6.32E-02 | 15.293 | 2.65E-05        | Month    | 1.57E-02 | 0.125 |
|                        | Edge complex. | 0.157     | 3.47E-02 | 4.533  | <b>9.54E-06</b> | Residual | 0.265    | 0.515 |
| <i>Diversity</i>       | Intercept     | 0.974     | 7.26E-02 | 13.427 | 4.48E-05        | Month    | 2.30E-02 | 0.152 |
|                        | Diversity     | 0.118     | 3.50E-02 | 3.355  | <b>9.36E-04</b> | Residual | 0.274    | 0.524 |

**BUFFER 800 M****All species**

|                        |               |        |       |        |                 |          |        |       |
|------------------------|---------------|--------|-------|--------|-----------------|----------|--------|-------|
| <i>Fragmentation</i>   | Intercept     | 18.546 | 1.121 | 16.546 | 1.51E-05        | Month    | 7.174  | 2.678 |
|                        | Fragmentation | -0.591 | 0.224 | -2.642 | <b>8.84E-03</b> | Residual | 11.123 | 3.335 |
| <i>Edge complexity</i> | Intercept     | 18.505 | 1.083 | 17.094 | 1.29E-05        | Month    | 6.700  | 2.588 |
|                        | Edge complex. | 1.181  | 0.214 | 5.518  | <b>9.70E-08</b> | Residual | 10.082 | 3.175 |
| <i>Diversity</i>       | Intercept     | 18.511 | 1.084 | 17.078 | 1.28E-05        | Month    | 6.743  | 2.597 |
|                        | Diversity     | -1.461 | 0.205 | -7.131 | <b>1.46E-11</b> | Residual | 9.312  | 3.052 |

**Frugivores**

|                        |               |           |          |           |                 |          |       |       |
|------------------------|---------------|-----------|----------|-----------|-----------------|----------|-------|-------|
| <i>Fragmentation</i>   | Intercept     | 0.991     | 3.79E-02 | 26.183    | 8.15E-70        | Month    | 0.000 | 0.000 |
|                        | Fragmentation | -3.40E-04 | 3.79E-02 | -8.98E-03 | 0.993           | Residual | 0.321 | 0.567 |
| <i>Edge complexity</i> | Intercept     | 0.991     | 3.13E-02 | 31.682    | 2.54E-84        | Month    | 0.000 | 0.000 |
|                        | Edge complex. | 0.318     | 3.13E-02 | 10.151    | <b>3.91E-20</b> | Residual | 0.219 | 0.468 |
| <i>Diversity</i>       | Intercept     | 0.991     | 3.57E-02 | 27.744    | 4.26E-74        | Month    | 0.000 | 0.000 |
|                        | Diversity     | -0.187    | 3.57E-02 | -5.221    | <b>4.08E-07</b> | Residual | 0.286 | 0.535 |

**Granivores**

|                        |               |           |       |        |                 |          |       |       |
|------------------------|---------------|-----------|-------|--------|-----------------|----------|-------|-------|
| <i>Fragmentation</i>   | Intercept     | 4.964     | 0.441 | 11.250 | 1.15E-04        | Month    | 1.070 | 1.034 |
|                        | Fragmentation | -9.10E-02 | 0.117 | -0.780 | 0.436           | Residual | 3.027 | 1.740 |
| <i>Edge complexity</i> | Intercept     | 4.937     | 0.418 | 11.823 | 9.01E-05        | Month    | 0.961 | 0.980 |
|                        | Edge complex. | 0.642     | 0.109 | 5.881  | <b>1.52E-08</b> | Residual | 2.624 | 1.620 |
| <i>Diversity</i>       | Intercept     | 4.948     | 0.423 | 11.696 | 9.45E-05        | Month    | 0.985 | 0.993 |
|                        | Diversity     | -0.564    | 0.111 | -5.104 | <b>7.24E-07</b> | Residual | 2.715 | 1.648 |

**Invertivores**

|                        |               |          |          |        |                 |          |          |       |
|------------------------|---------------|----------|----------|--------|-----------------|----------|----------|-------|
| <i>Fragmentation</i>   | Intercept     | 1.217    | 9.34E-02 | 13.028 | 7.22E-05        | Month    | 4.36E-02 | 0.209 |
|                        | Fragmentation | 6.97E-03 | 3.50E-02 | 0.199  | 0.842           | Residual | 0.273    | 0.522 |
| <i>Edge complexity</i> | Intercept     | 1.206    | 8.03E-02 | 15.008 | 4.20E-05        | Month    | 3.24E-02 | 0.180 |
|                        | Edge complex. | 0.273    | 3.00E-02 | 9.116  | <b>5.26E-17</b> | Residual | 0.198    | 0.445 |
| <i>Diversity</i>       | Intercept     | 1.210    | 8.47E-02 | 14.295 | 4.67E-05        | Month    | 3.58E-02 | 0.189 |
|                        | Diversity     | -0.219   | 3.18E-02 | -6.890 | <b>5.93E-11</b> | Residual | 0.225    | 0.474 |

**Omnivores**

|                        |               |           |          |        |                 |          |          |       |
|------------------------|---------------|-----------|----------|--------|-----------------|----------|----------|-------|
| <i>Fragmentation</i>   | Intercept     | 0.971     | 7.04E-02 | 13.793 | 4.02E-05        | Month    | 2.09E-02 | 0.145 |
|                        | Fragmentation | -7.31E-02 | 3.57E-02 | -2.050 | <b>4.16E-02</b> | Residual | 0.284    | 0.533 |
| <i>Edge complexity</i> | Intercept     | 0.970     | 6.90E-02 | 14.042 | 3.85E-05        | Month    | 1.98E-02 | 0.141 |
|                        | Edge complex. | 7.88E-02  | 3.58E-02 | 2.202  | <b>2.87E-02</b> | Residual | 0.283    | 0.532 |
| <i>Diversity</i>       | Intercept     | 0.971     | 7.04E-02 | 13.788 | 3.93E-05        | Month    | 2.09E-02 | 0.145 |
|                        | Diversity     | -6.99E-02 | 3.57E-02 | -1.957 | 5.16E-02        | Residual | 0.284    | 0.533 |

**BUFFER 1 600 M****All species**

|                        |               |        |       |        |                 |          |        |       |
|------------------------|---------------|--------|-------|--------|-----------------|----------|--------|-------|
| <i>Fragmentation</i>   | Intercept     | 18.571 | 1.148 | 16.172 | 1.68E-05        | Month    | 7.573  | 2.752 |
|                        | Fragmentation | -1.039 | 0.215 | -4.827 | <b>2.61E-06</b> | Residual | 10.356 | 3.218 |
| <i>Edge complexity</i> | Intercept     | 18.586 | 1.157 | 16.065 | 1.76E-05        | Month    | 7.680  | 2.771 |
|                        | Edge complex. | 0.864  | 0.219 | 3.939  | <b>1.10E-04</b> | Residual | 10.699 | 3.271 |
| <i>Diversity</i>       | Intercept     | 18.544 | 1.120 | 16.552 | 1.51E-05        | Month    | 7.173  | 2.678 |
|                        | Diversity     | -0.730 | 0.222 | -3.293 | <b>1.16E-03</b> | Residual | 10.934 | 3.307 |

**Frugivores**

|                        |               |           |          |        |                 |          |          |          |
|------------------------|---------------|-----------|----------|--------|-----------------|----------|----------|----------|
| <i>Fragmentation</i>   | Intercept     | 0.991     | 3.76E-02 | 26.373 | 2.42E-70        | Month    | 3.19E-18 | 1.79E-09 |
|                        | Fragmentation | -6.76E-02 | 3.76E-02 | -1.798 | 7.35E-02        | Residual | 0.316    | 0.563    |
| <i>Edge complexity</i> | Intercept     | 0.992     | 3.85E-02 | 25.792 | 1.52E-03        | Month    | 5.48E-04 | 2.34E-02 |
|                        | Edge complex. | 0.115     | 3.70E-02 | 3.117  | <b>2.07E-03</b> | Residual | 0.307    | 0.554    |
| <i>Diversity</i>       | Intercept     | 0.991     | 3.37E-02 | 29.398 | 1.72E-78        | Month    | 0.000    | 0.000    |
|                        | Diversity     | -0.257    | 3.37E-02 | -7.607 | <b>7.88E-13</b> | Residual | 0.255    | 0.505    |

**Granivores**

|                        |               |          |       |        |                 |          |       |       |
|------------------------|---------------|----------|-------|--------|-----------------|----------|-------|-------|
| <i>Fragmentation</i>   | Intercept     | 4.968    | 0.446 | 11.150 | 1.19E-04        | Month    | 1.094 | 1.046 |
|                        | Fragmentation | -0.231   | 0.115 | -2.000 | <b>4.67E-02</b> | Residual | 2.979 | 1.726 |
| <i>Edge complexity</i> | Intercept     | 4.968    | 0.445 | 11.154 | 1.19E-04        | Month    | 1.092 | 1.045 |
|                        | Edge complex. | 6.93E-02 | 0.117 | 0.594  | 0.553           | Residual | 3.029 | 1.740 |
| <i>Diversity</i>       | Intercept     | 4.958    | 0.434 | 11.414 | 1.07E-04        | Month    | 1.039 | 1.019 |
|                        | Diversity     | -0.414   | 0.113 | -3.657 | <b>3.20E-04</b> | Residual | 2.861 | 1.691 |

**Invertivores**

|                        |               |          |          |        |                 |          |          |       |
|------------------------|---------------|----------|----------|--------|-----------------|----------|----------|-------|
| <i>Fragmentation</i>   | Intercept     | 1.218    | 9.40E-02 | 12.952 | 7.18E-05        | Month    | 4.47E-02 | 0.211 |
|                        | Fragmentation | -0.108   | 3.41E-02 | -3.170 | <b>1.74E-03</b> | Residual | 0.260    | 0.510 |
| <i>Edge complexity</i> | Intercept     | 1.219    | 9.55E-02 | 12.766 | 7.94E-05        | Month    | 4.62E-02 | 0.215 |
|                        | Edge complex. | 8.55E-02 | 3.45E-02 | 2.478  | <b>1.40E-02</b> | Residual | 0.265    | 0.515 |
| <i>Diversity</i>       | Intercept     | 1.213    | 8.78E-02 | 13.812 | 5.69E-05        | Month    | 3.90E-02 | 0.198 |
|                        | Diversity     | -0.213   | 3.19E-02 | -6.672 | <b>2.06E-10</b> | Residual | 0.227    | 0.476 |

**Omnivores**

|                        |               |           |          |        |                 |          |          |       |
|------------------------|---------------|-----------|----------|--------|-----------------|----------|----------|-------|
| <i>Fragmentation</i>   | Intercept     | 0.974     | 7.32E-02 | 13.307 | 4.54E-05        | Month    | 2.33E-02 | 0.153 |
|                        | Fragmentation | -7.41E-02 | 3.56E-02 | -2.082 | <b>3.85E-02</b> | Residual | 0.283    | 0.532 |
| <i>Edge complexity</i> | Intercept     | 0.978     | 7.49E-02 | 13.056 | 5.35E-05        | Month    | 2.54E-02 | 0.159 |
|                        | Edge complex. | 0.158     | 3.43E-02 | 4.595  | <b>7.33E-06</b> | Residual | 0.263    | 0.513 |
| <i>Diversity</i>       | Intercept     | 0.971     | 6.97E-02 | 13.929 | 3.85E-05        | Month    | 2.05E-02 | 0.143 |
|                        | Diversity     | -0.109    | 3.52E-02 | -3.102 | <b>2.18E-03</b> | Residual | 0.277    | 0.526 |

**BUFFER 3 200 M****All species**

|                        |               |        |       |        |                 |          |        |       |
|------------------------|---------------|--------|-------|--------|-----------------|----------|--------|-------|
| <i>Fragmentation</i>   | Intercept     | 18.524 | 1.112 | 16.660 | 1.45E-05        | Month    | 7.079  | 2.661 |
|                        | Fragmentation | 1.065  | 0.216 | 4.939  | <b>1.56E-06</b> | Residual | 10.323 | 3.213 |
| <i>Edge complexity</i> | Intercept     | 18.565 | 1.148 | 16.177 | 1.69E-05        | Month    | 7.528  | 2.744 |
|                        | Edge complex. | 0.197  | 0.227 | 0.867  | 0.387           | Residual | 11.429 | 3.381 |
| <i>Diversity</i>       | Intercept     | 18.543 | 1.117 | 16.597 | 1.49E-05        | Month    | 7.136  | 2.671 |
|                        | Diversity     | -0.831 | 0.220 | -3.776 | <b>2.06E-04</b> | Residual | 10.774 | 3.282 |

**Frugivores**

|                      |               |       |          |        |                 |          |       |       |
|----------------------|---------------|-------|----------|--------|-----------------|----------|-------|-------|
| <i>Fragmentation</i> | Intercept     | 0.991 | 3.36E-02 | 29.480 | 1.05E-78        | Month    | 0.000 | 0.000 |
|                      | Fragmentation | 0.259 | 3.36E-02 | 7.710  | <b>4.19E-13</b> | Residual | 0.253 | 0.503 |

|                        |               |          |          |        |                 |          |          |          |
|------------------------|---------------|----------|----------|--------|-----------------|----------|----------|----------|
| <i>Edge complexity</i> | Intercept     | 0.997    | 4.32E-02 | 23.087 | 3.49E-04        | Month    | 2.72E-03 | 5.22E-02 |
|                        | Edge complex. | 0.139    | 3.66E-02 | 3.807  | <b>1.83E-04</b> | Residual | 0.300    | 0.548    |
| <i>Diversity</i>       | Intercept     | 0.991    | 3.27E-02 | 30.358 | 5.64E-81        | Month    | 0.000    | 0.000    |
|                        | Diversity     | -0.286   | 3.27E-02 | -8.744 | <b>5.66E-16</b> | Residual | 0.239    | 0.489    |
| <b>Granivores</b>      |               |          |          |        |                 |          |          |          |
| <i>Fragmentation</i>   | Intercept     | 4.953    | 0.432    | 11.453 | 1.04E-04        | Month    | 1.029    | 1.014    |
|                        | Fragmentation | 0.411    | 0.114    | 3.622  | <b>3.64E-04</b> | Residual | 2.865    | 1.692    |
| <i>Edge complexity</i> | Intercept     | 4.974    | 0.453    | 10.991 | 1.28E-04        | Month    | 1.132    | 1.064    |
|                        | Edge complex. | 0.249    | 0.116    | 2.156  | <b>3.22E-02</b> | Residual | 2.968    | 1.723    |
| <i>Diversity</i>       | Intercept     | 4.959    | 0.436    | 11.382 | 1.09E-04        | Month    | 1.045    | 1.022    |
|                        | Diversity     | -0.383   | 0.114    | -3.360 | <b>9.20E-04</b> | Residual | 2.886    | 1.699    |
| <b>Invertivores</b>    |               |          |          |        |                 |          |          |          |
| <i>Fragmentation</i>   | Intercept     | 1.211    | 8.65E-02 | 13.996 | 4.77E-05        | Month    | 3.78E-02 | 0.194    |
|                        | Fragmentation | 0.227    | 3.15E-02 | 7.215  | <b>8.89E-12</b> | Residual | 0.221    | 0.470    |
| <i>Edge complexity</i> | Intercept     | 1.223    | 9.89E-02 | 12.367 | 8.62E-05        | Month    | 5.07E-02 | 0.225    |
|                        | Edge complex. | 0.156    | 3.33E-02 | 4.677  | <b>5.11E-06</b> | Residual | 0.247    | 0.497    |
| <i>Diversity</i>       | Intercept     | 1.213    | 8.78E-02 | 13.818 | 5.82E-05        | Month    | 3.90E-02 | 0.197    |
|                        | Diversity     | -0.212   | 3.19E-02 | -6.641 | <b>2.47E-10</b> | Residual | 0.227    | 0.477    |
| <b>Omnivores</b>       |               |          |          |        |                 |          |          |          |
| <i>Fragmentation</i>   | Intercept     | 0.972    | 7.17E-02 | 13.557 | 4.16E-05        | Month    | 2.19E-02 | 0.148    |
|                        | Fragmentation | 5.25E-02 | 3.58E-02 | 1.466  | 0.144           | Residual | 0.286    | 0.535    |
| <i>Edge complexity</i> | Intercept     | 0.975    | 7.44E-02 | 13.105 | 4.95E-05        | Month    | 2.43E-02 | 0.156    |
|                        | Edge complex. | 5.51E-02 | 3.58E-02 | 1.540  | 0.125           | Residual | 0.285    | 0.534    |
| <i>Diversity</i>       | Intercept     | 0.970    | 6.85E-02 | 14.175 | 3.66E-05        | Month    | 1.97E-02 | 0.140    |
|                        | Diversity     | -0.139   | 3.48E-02 | -4.003 | <b>8.59E-05</b> | Residual | 0.270    | 0.519    |

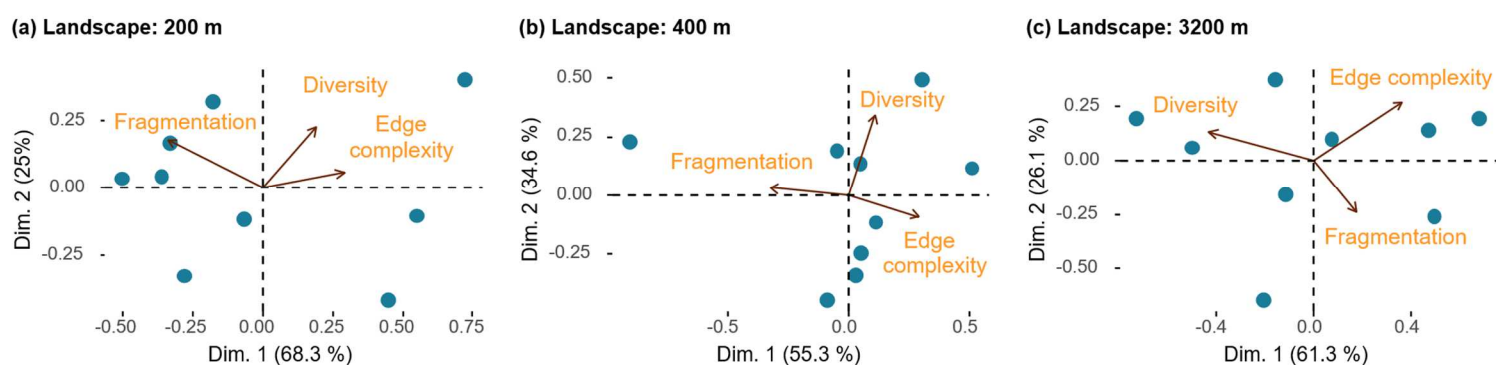

**Figure S2** – Principal Component Analysis (PCA) of landscape structure variables measured at 200 m, 400 m and 3 200 m from the crop. The percentage of variance explained by the first two principal components (Dim. 1 and Dim. 2) is indicated in parentheses. Arrows indicate the direction of each variable, with their contribution reflected in the arrow length. Blue dots represent the sampled sites.

**Table S5** – Linear Mixed Models (LMMs) fitted to bird species richness with landscape structure as predicted variable and month of the year as random effects. Models were fitted separately for buffers of 200, 400, 800, 1 600 and 3 200 m. Log transformation of species richness was applied for the models of frugivores, invertivores and omnivores. *Std. error.* = standard error; *Std. dev.* = standard deviation; AICc = Akaike Information Criterion corrected for small sample size. Significant p-values for the explanatory variable and the lowest AICc for all species and each trait (best buffer) are shown in bold.

| Model               | Fixed effects |            |          |                 | Random effects |           |       | AICc     |
|---------------------|---------------|------------|----------|-----------------|----------------|-----------|-------|----------|
|                     | Estimate      | Std. error | t-value  | p-value         | Variance       | Std. dev. |       |          |
| <b>BUFFER 200 M</b> |               |            |          |                 |                |           |       |          |
| <b>All species</b>  |               |            |          |                 |                |           |       |          |
| Intercept           | 18.588        | 1.148      | 16.194   | 1.66E-05        | Month          | 7.527     | 2.743 | 1211.633 |
| Landscape structure | 9.04E-03      | 8.64E-03   | 1.046    | 0.297           | Residual       | 11.411    | 3.378 |          |
| <b>Frugivores</b>   |               |            |          |                 |                |           |       |          |
| Intercept           | 0.983         | 3.73E-02   | 26.320   | 3.37E-70        | Month          | 0.000     | 0.000 | 395.568  |
| Landscape structure | -3.99E-03     | 1.42E-03   | -2.812   | <b>5.36E-03</b> | Residual       | 0.310     | 0.557 |          |
| <b>Granivores</b>   |               |            |          |                 |                |           |       |          |
| Intercept           | 4.937         | 0.438      | 11.260   | 1.12E-04        | Month          | 1.055     | 1.027 | 910.611  |
| Landscape structure | -8.97E-03     | 4.42E-03   | -2.031   | <b>4.35E-02</b> | Residual       | 2.979     | 1.726 |          |
| <b>Invertivores</b> |               |            |          |                 |                |           |       |          |
| Intercept           | 1.208         | 9.10E-02   | 13.268   | 6.62E-05        | Month          | 4.11E-02  | 0.203 | 372.068  |
| Landscape structure | -2.72E-03     | 1.32E-03   | -2.054   | <b>4.12E-02</b> | Residual       | 0.268     | 0.517 |          |
| <b>Omnivores</b>    |               |            |          |                 |                |           |       |          |
| Intercept           | 0.987         | 7.59E-02   | 13.004   | 4.84E-05        | Month          | 2.58E-02  | 0.161 | 376.839  |
| Landscape structure | 4.16E-03      | 1.34E-03   | 3.094    | <b>2.23E-03</b> | Residual       | 0.276     | 0.525 |          |
| <b>BUFFER 400 M</b> |               |            |          |                 |                |           |       |          |
| <b>All species</b>  |               |            |          |                 |                |           |       |          |
| Intercept           | 18.497        | 1.119      | 16.534   | 1.51E-05        | Month          | 7.139     | 2.672 | 1206.544 |
| Landscape structure | 2.98E-02      | 1.27E-02   | 2.335    | <b>2.05E-02</b> | Residual       | 11.200    | 3.347 |          |
| <b>Frugivores</b>   |               |            |          |                 |                |           |       |          |
| Intercept           | 0.982         | 3.75E-02   | 26.208   | 6.94E-70        | Month          | 0.000     | 0.000 | 395.996  |
| Landscape structure | 5.45E-03      | 2.12E-03   | 2.578    | <b>1.06E-02</b> | Residual       | 0.312     | 0.558 |          |
| <b>Granivores</b>   |               |            |          |                 |                |           |       |          |
| Intercept           | 4.965         | 0.444      | 11.187   | 1.17E-04        | Month          | 1.082     | 1.040 | 913.899  |
| Landscape structure | 2.73E-04      | 6.63E-03   | 4.11E-02 | 0.967           | Residual       | 3.034     | 1.742 |          |
| <b>Invertivores</b> |               |            |          |                 |                |           |       |          |
| Intercept           | 1.215         | 9.29E-02   | 13.086   | 7.03E-05        | Month          | 4.29E-02  | 0.207 | 375.379  |
| Landscape structure | 5.33E-04      | 1.99E-03   | 0.268    | 0.789           | Residual       | 0.273     | 0.522 |          |
| <b>Omnivores</b>    |               |            |          |                 |                |           |       |          |
| Intercept           | 0.954         | 6.63E-02   | 14.401   | 3.33E-05        | Month          | 1.81E-02  | 0.134 | 365.421  |
| Landscape structure | 8.95E-03      | 1.96E-03   | 4.574    | <b>8.02E-06</b> | Residual       | 0.264     | 0.514 |          |

**BUFFER 800 M****All species**

|                     |           |          |        |                 |          |       |       |                 |
|---------------------|-----------|----------|--------|-----------------|----------|-------|-------|-----------------|
| Intercept           | 18.179    | 1.067    | 17.032 | 1.26E-05        | Month    | 6.512 | 2.552 | <b>1167.508</b> |
| Landscape structure | -5.83E-02 | 8.24E-03 | -7.074 | <b>2.04E-11</b> | Residual | 9.347 | 3.057 |                 |

**Frugivores**

|                     |           |          |        |                 |          |       |       |         |
|---------------------|-----------|----------|--------|-----------------|----------|-------|-------|---------|
| Intercept           | 0.945     | 3.59E-02 | 26.298 | 3.90E-70        | Month    | 0.000 | 0.000 | 369.559 |
| Landscape structure | -8.47E-03 | 1.40E-03 | -6.031 | <b>6.74E-09</b> | Residual | 0.276 | 0.525 |         |

**Granivores**

|                     |           |          |        |                 |          |       |       |                |
|---------------------|-----------|----------|--------|-----------------|----------|-------|-------|----------------|
| Intercept           | 4.817     | 0.419    | 11.493 | 9.81E-05        | Month    | 0.961 | 0.980 | <b>889.462</b> |
| Landscape structure | -2.29E-02 | 4.43E-03 | -5.158 | <b>5.60E-07</b> | Residual | 2.710 | 1.646 |                |

**Invertivores**

|                     |           |          |        |                 |          |          |       |         |
|---------------------|-----------|----------|--------|-----------------|----------|----------|-------|---------|
| Intercept           | 1.161     | 8.29E-02 | 14.015 | 5.04E-05        | Month    | 3.35E-02 | 0.183 | 335.630 |
| Landscape structure | -8.56E-03 | 1.28E-03 | -6.668 | <b>2.11E-10</b> | Residual | 0.228    | 0.477 |         |

**Omnivores**

|                     |           |          |        |                 |          |          |       |         |
|---------------------|-----------|----------|--------|-----------------|----------|----------|-------|---------|
| Intercept           | 0.949     | 6.88E-02 | 13.787 | 3.39E-05        | Month    | 1.92E-02 | 0.139 | 379.241 |
| Landscape structure | -3.76E-03 | 1.42E-03 | -2.641 | <b>8.87E-03</b> | Residual | 0.281    | 0.530 |         |

**BUFFER 1 600 M****All species**

|                     |           |          |        |                 |          |        |       |          |
|---------------------|-----------|----------|--------|-----------------|----------|--------|-------|----------|
| Intercept           | 18.592    | 1.126    | 16.508 | 1.53E-05        | Month    | 7.282  | 2.698 | 1183.088 |
| Landscape structure | -4.90E-02 | 8.71E-03 | -5.619 | <b>5.87E-08</b> | Residual | 10.020 | 3.165 |          |

**Frugivores**

|                     |           |          |        |                 |          |          |          |                |
|---------------------|-----------|----------|--------|-----------------|----------|----------|----------|----------------|
| Intercept           | 0.998     | 3.37E-02 | 29.617 | 4.62E-79        | Month    | 1.40E-16 | 1.18E-08 | <b>351.502</b> |
| Landscape structure | -1.06E-02 | 1.39E-03 | -7.629 | <b>6.91E-13</b> | Residual | 0.254    | 0.504    |                |

**Granivores**

|                     |           |          |        |                 |          |       |       |         |
|---------------------|-----------|----------|--------|-----------------|----------|-------|-------|---------|
| Intercept           | 4.977     | 0.441    | 11.279 | 1.13E-04        | Month    | 1.075 | 1.037 | 901.899 |
| Landscape structure | -1.68E-02 | 4.66E-03 | -3.609 | <b>3.82E-04</b> | Residual | 2.863 | 1.692 |         |

**Invertivores**

|                     |           |          |        |                 |          |          |       |                |
|---------------------|-----------|----------|--------|-----------------|----------|----------|-------|----------------|
| Intercept           | 1.224     | 9.19E-02 | 13.320 | 6.46E-05        | Month    | 4.36E-02 | 0.209 | <b>329.967</b> |
| Landscape structure | -9.26E-03 | 1.29E-03 | -7.167 | <b>1.18E-11</b> | Residual | 0.221    | 0.470 |                |

**Omnivores**

|                     |           |          |        |                 |          |          |       |                |
|---------------------|-----------|----------|--------|-----------------|----------|----------|-------|----------------|
| Intercept           | 0.977     | 7.01E-02 | 13.947 | 3.92E-05        | Month    | 2.13E-02 | 0.146 | <b>364.257</b> |
| Landscape structure | -6.73E-03 | 1.41E-03 | -4.783 | <b>3.18E-06</b> | Residual | 0.262    | 0.511 |                |

**BUFFER 3 200 M****All species**

|                     |          |          |        |                 |          |        |       |          |
|---------------------|----------|----------|--------|-----------------|----------|--------|-------|----------|
| Intercept           | 18.636   | 1.145    | 16.270 | 1.62E-05        | Month    | 7.499  | 2.738 | 1207.608 |
| Landscape structure | 1.76E-02 | 7.57E-03 | 2.330  | <b>2.07E-02</b> | Residual | 11.189 | 3.345 |          |

**Frugivores**

|                     |          |          |        |                 |          |          |          |         |
|---------------------|----------|----------|--------|-----------------|----------|----------|----------|---------|
| Intercept           | 1.026    | 4.03E-02 | 25.460 | 3.73E-04        | Month    | 2.05E-03 | 4.53E-02 | 365.829 |
| Landscape structure | 7.55E-03 | 1.17E-03 | 6.432  | <b>7.99E-10</b> | Residual | 0.269    | 0.519    |         |

**Granivores**

|                     |          |          |        |                 |          |       |       |         |
|---------------------|----------|----------|--------|-----------------|----------|-------|-------|---------|
| Intercept           | 5.016    | 0.448    | 11.193 | 1.15E-04        | Month    | 1.109 | 1.053 | 906.308 |
| Landscape structure | 1.15E-02 | 3.86E-03 | 2.969  | <b>3.33E-03</b> | Residual | 2.915 | 1.707 |         |

**Invertivores**

|                     |          |          |        |                 |          |          |       |         |
|---------------------|----------|----------|--------|-----------------|----------|----------|-------|---------|
| Intercept           | 1.247    | 9.55E-02 | 13.065 | 6.60E-05        | Month    | 4.71E-02 | 0.217 | 341.256 |
| Landscape structure | 6.74E-03 | 1.09E-03 | 6.189  | <b>2.99E-09</b> | Residual | 0.232    | 0.481 |         |

**Omnivores**

|                     |          |          |        |                 |          |          |       |         |
|---------------------|----------|----------|--------|-----------------|----------|----------|-------|---------|
| Intercept           | 0.988    | 7.32E-02 | 13.488 | 4.09E-05        | Month    | 2.33E-02 | 0.153 | 378.672 |
| Landscape structure | 3.35E-03 | 1.19E-03 | 2.809  | <b>5.42E-03</b> | Residual | 0.278    | 0.528 |         |

**Table S6** – Eigenvalues, explained variance, and variable loadings for the first 3 principal components (Dim. 1–Dim. 3) from PCAs of field-scale descriptors and landscape descriptors measured within 200–3 200 m buffers.

|                          | Eigenvalues and explained variance |        |        |                        | Loadings |        |        |
|--------------------------|------------------------------------|--------|--------|------------------------|----------|--------|--------|
|                          | Dim. 1                             | Dim. 2 | Dim. 3 |                        | Dim. 1   | Dim. 2 | Dim. 3 |
| <b>FIELD</b>             |                                    |        |        |                        |          |        |        |
| Eigenvalue               | 0.18                               | 0.07   | 0.04   | <i>Field width</i>     | 0.32     | 0.02   | 0.13   |
| % of variance            | 62.54                              | 23.53  | 13.93  | <i>Plot area</i>       | 0.09     | 0.24   | -0.06  |
| Cumulative % of variance | 62.54                              | 86.07  | 100.00 | <i>Tree cover</i>      | -0.27    | 0.10   | 0.13   |
| <b>BUFFER 200 M</b>      |                                    |        |        |                        |          |        |        |
| Eigenvalue               | 0.18                               | 0.07   | 0.02   | <i>Edge complexity</i> | 0.25     | 0.05   | 0.10   |
| % of variance            | 68.34                              | 24.97  | 6.69   | <i>Fragmentation</i>   | -0.30    | 0.16   | 0.05   |
| Cumulative % of variance | 68.34                              | 93.31  | 100.00 | <i>Diversity</i>       | 0.17     | 0.20   | -0.07  |
| <b>BUFFER 400 M</b>      |                                    |        |        |                        |          |        |        |
| Eigenvalue               | 0.13                               | 0.08   | 0.02   | <i>Edge complexity</i> | 0.24     | -0.08  | 0.11   |
| % of variance            | 55.30                              | 34.64  | 10.06  | <i>Fragmentation</i>   | -0.27    | 0.02   | 0.11   |
| Cumulative % of variance | 55.30                              | 89.94  | 100.00 | <i>Diversity</i>       | 0.09     | 0.28   | 0.02   |
| <b>BUFFER 800 M</b>      |                                    |        |        |                        |          |        |        |
| Eigenvalue               | 0.20                               | 0.07   | 0.02   | <i>Edge complexity</i> | -0.27    | 0.13   | 0.08   |
| % of variance            | 70.51                              | 23.80  | 5.69   | <i>Fragmentation</i>   | 0.17     | 0.23   | -0.04  |
| Cumulative % of variance | 70.51                              | 94.31  | 100.00 | <i>Diversity</i>       | 0.32     | -0.01  | 0.09   |
| <b>BUFFER 1 600 M</b>    |                                    |        |        |                        |          |        |        |
| Eigenvalue               | 0.18                               | 0.10   | 0.01   | <i>Edge complexity</i> | -0.29    | 0.09   | 0.08   |
| % of variance            | 60.36                              | 34.62  | 5.02   | <i>Fragmentation</i>   | 0.27     | -0.07  | 0.09   |
| Cumulative % of variance | 60.36                              | 94.98  | 100.00 | <i>Diversity</i>       | 0.14     | 0.30   | 0.00   |
| <b>BUFFER 3 200 M</b>    |                                    |        |        |                        |          |        |        |
| Eigenvalue               | 0.20                               | 0.08   | 0.04   | <i>Edge complexity</i> | 0.27     | 0.21   | 0.07   |
| % of variance            | 61.27                              | 26.10  | 12.63  | <i>Fragmentation</i>   | 0.13     | -0.18  | 0.15   |
| Cumulative % of variance | 61.27                              | 87.37  | 100.00 | <i>Diversity</i>       | -0.33    | 0.10   | 0.12   |

**Table S7** – Linear Mixed Models (LMMs) fitted to bird species richness with field openness as predicted variable and month of the year as random effects. Log transformation of species richness was applied for the models of frugivores, invertivores and omnivores. *Std. error.* = standard error; *Std. dev.* = standard deviation. Significant p-value for the explanatory variable is shown in bold.

| Model               | Fixed effects |            |         |                 | Random effects |          |           |
|---------------------|---------------|------------|---------|-----------------|----------------|----------|-----------|
|                     | Estimate      | Std. error | t-value | p-value         |                | Variance | Std. dev. |
| <b>All species</b>  |               |            |         |                 |                |          |           |
| Intercept           | 18.495        | 1.136      | 16.287  | 1.42E-05        | Month          | 7.281    | 2.698     |
| Field openness      | 5.96E-03      | 1.09E-02   | 0.548   | 0.584           | Residual       | 11.461   | 3.385     |
| <b>Frugivores</b>   |               |            |         |                 |                |          |           |
| Intercept           | 0.965         | 4.10E-02   | 23.524  | 3.24E-62        | Month          | 0.000    | 0.000     |
| Field openness      | 2.86E-03      | 1.76E-03   | 1.621   | 0.106           | Residual       | 0.317    | 0.563     |
| <b>Granivores</b>   |               |            |         |                 |                |          |           |
| Intercept           | 4.907         | 0.438      | 11.191  | 9.76E-05        | Month          | 1.034    | 1.017     |
| Field openness      | 5.53E-03      | 5.58E-03   | 0.991   | 0.323           | Residual       | 3.024    | 1.739     |
| <b>Invertivores</b> |               |            |         |                 |                |          |           |
| Intercept           | 1.242         | 9.93E-02   | 12.509  | 5.81E-05        | Month          | 4.87E-02 | 0.221     |
| Field openness      | -2.34E-03     | 1.66E-03   | -1.404  | 0.162           | Residual       | 0.270    | 0.519     |
| <b>Omnivores</b>    |               |            |         |                 |                |          |           |
| Intercept           | 0.935         | 6.90E-02   | 13.552  | 2.16E-05        | Month          | 1.79E-02 | 0.134     |
| Field openness      | 3.60E-03      | 1.70E-03   | 2.117   | <b>3.54E-02</b> | Residual       | 0.284    | 0.533     |

**Table S8** – Linear Mixed Models (LMMs) fitted to bird species richness with field openness and landscape structure as predicted variables and month of the year as random effects. Log transformation of species richness was applied for the models of frugivores, invertivores and omnivores. *Std. error.* = standard error; *Std. dev.* = standard deviation; Land. struct. = Landscape structure; R<sup>2</sup>m = marginal R<sup>2</sup>; R<sup>2</sup>c = conditional R<sup>2</sup>. Significant p-values for explanatory variables are shown in bold.

|                       | Fixed effects |            |         |                 | Random effects |          |           | R <sup>2</sup> m | R <sup>2</sup> c |
|-----------------------|---------------|------------|---------|-----------------|----------------|----------|-----------|------------------|------------------|
|                       | Estimate      | Std. error | t-value | p-value         |                | Variance | Std. dev. |                  |                  |
| <b>All species</b>    |               |            |         |                 |                |          |           |                  |                  |
| Intercept             | 18.045        | 1.049      | 17.200  | 1.03E-05        | Month          | 6.209    | 2.492     | 0.125            | 0.474            |
| Field openness        | 1.20E-02      | 9.85E-03   | 1.218   | 0.224           | Residual       | 9.336    | 3.056     |                  |                  |
| Land. struct. (800m)  | -5.92E-02     | 8.26E-03   | -7.159  | <b>1.25E-11</b> |                |          |           |                  |                  |
| <b>Frugivores</b>     |               |            |         |                 |                |          |           |                  |                  |
| Intercept             | 0.948         | 3.59E-02   | 26.426  | 2.41E-70        | Month          | 0.000    | 0.000     | 0.248            | 0.248            |
| Field openness        | 5.53E-03      | 1.57E-03   | 3.517   | <b>5.30E-04</b> | Residual       | 0.242    | 0.492     |                  |                  |
| Land. struct. (1600m) | -1.16E-02     | 1.38E-03   | -8.372  | <b>6.48E-15</b> |                |          |           |                  |                  |
| <b>Granivores</b>     |               |            |         |                 |                |          |           |                  |                  |
| Intercept             | 4.729         | 0.410      | 11.537  | 7.78E-05        | Month          | 0.895    | 0.946     | 9.15E-02         | 0.318            |
| Field openness        | 7.93E-03      | 5.29E-03   | 1.499   | 0.135           | Residual       | 2.698    | 1.643     |                  |                  |
| Land. struct. (800m)  | -2.35E-02     | 4.44E-03   | -5.282  | <b>3.11E-07</b> |                |          |           |                  |                  |

**Invertivores**

|                        |           |          |           |                 |          |          |       |       |       |
|------------------------|-----------|----------|-----------|-----------------|----------|----------|-------|-------|-------|
| Intercept              | 1.225     | 9.35E-02 | 13.103    | 5.05E-05        | Month    | 4.37E-02 | 0.209 |       |       |
| Field openness         | -6.94E-05 | 1.54E-03 | -4.50E-02 | 0.964           | Residual | 0.222    | 0.471 | 0.161 | 0.300 |
| Land. struct. (1 600m) | -9.25E-03 | 1.33E-03 | -6.979    | <b>3.60E-11</b> |          |          |       |       |       |

**Omnivores**

|                        |           |          |        |                 |          |          |       |       |       |
|------------------------|-----------|----------|--------|-----------------|----------|----------|-------|-------|-------|
| Intercept              | 0.919     | 6.21E-02 | 14.795 | 1.63E-05        | Month    | 1.38E-02 | 0.117 |       |       |
| Field openness         | 5.52E-03  | 1.63E-03 | 3.375  | <b>8.71E-04</b> | Residual | 0.252    | 0.502 | 0.133 | 0.178 |
| Land. struct. (1 600m) | -7.75E-03 | 1.41E-03 | -5.491 | <b>1.11E-07</b> |          |          |       |       |       |

---
